# Supplementary material for: Evaluation of the Effects of a Monthly Buprenorphine Depot Subcutaneous Injection on QT Interval During Treatment for Opioid Use Disorder
Source: PubMed Central journal article supplement (PMC6766787; doi:10.1002/cpt.1406), 2019-04-08

**Figure S1. Goodness of Fit Plots Including Predicted (PRED) vs Observed (QT), Individual Predicted (IPRED) vs QT (B), Individual Weighted Residuals (IWRES) vs IPRED, and Conditional Weighted Residuals (CWRES) vs Time Since First Dose for the Final Concentration-QT Model (Model #95)**

**Model 95, basic goodness of fit**

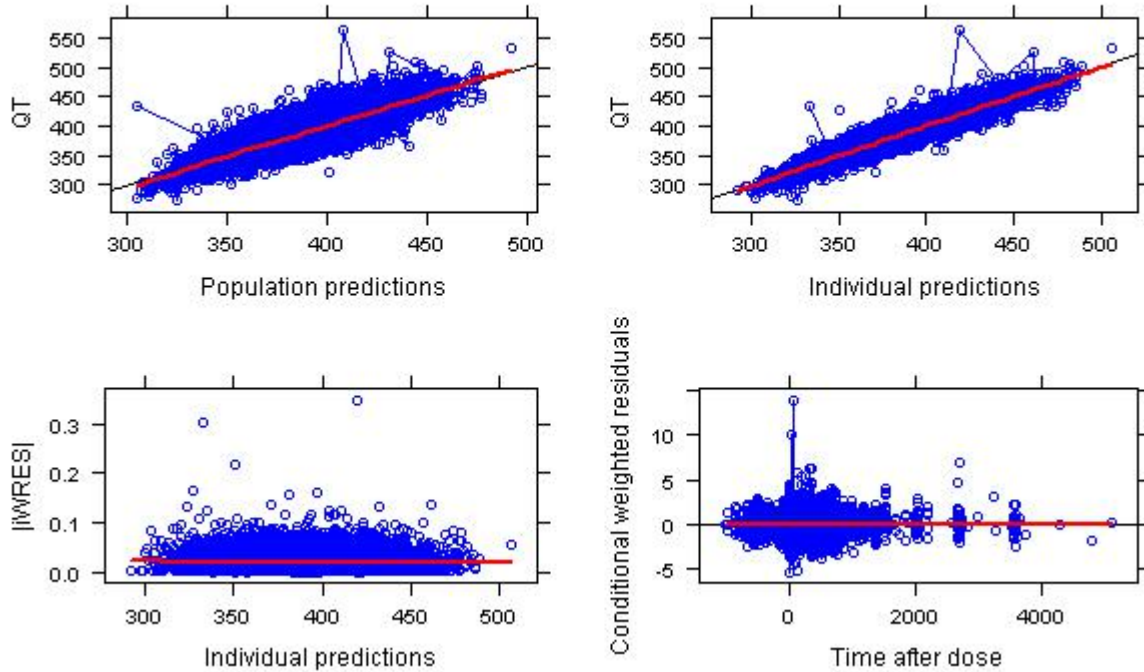

**Figure S2: Visual Predictive Check: QTc Over Time by Sex (0=males; 1=females)**

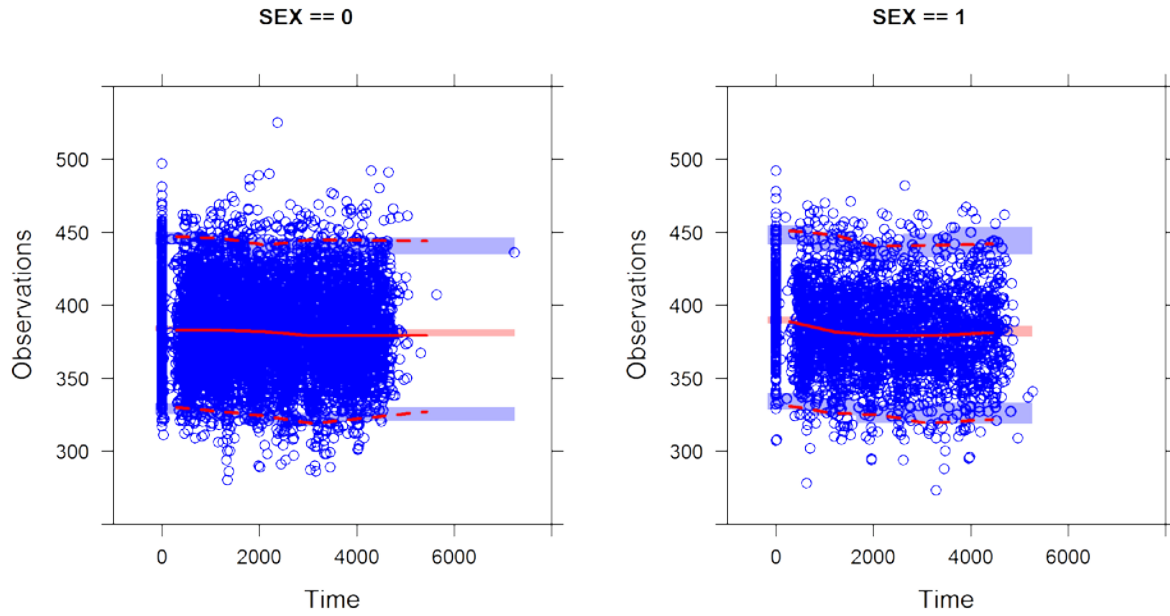

**Figure S3: Visual Predictive Check: QTc by Concentration**

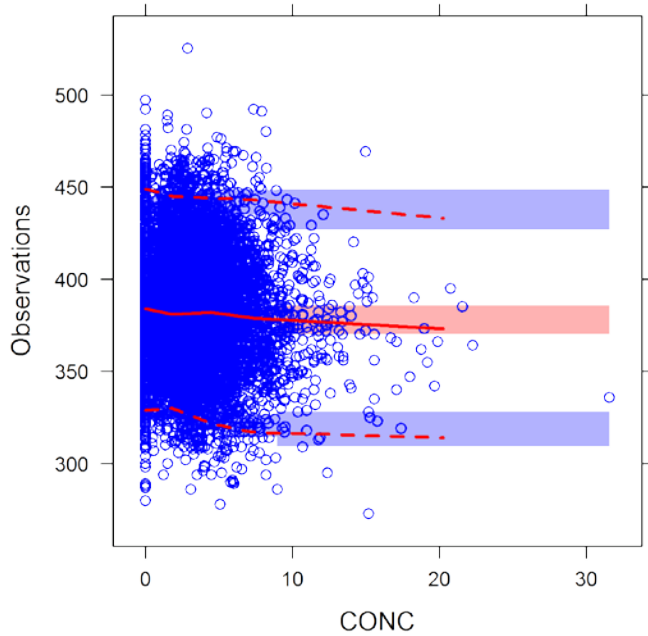

**Figure S4: Relationship between Age and QTcF Intervals**

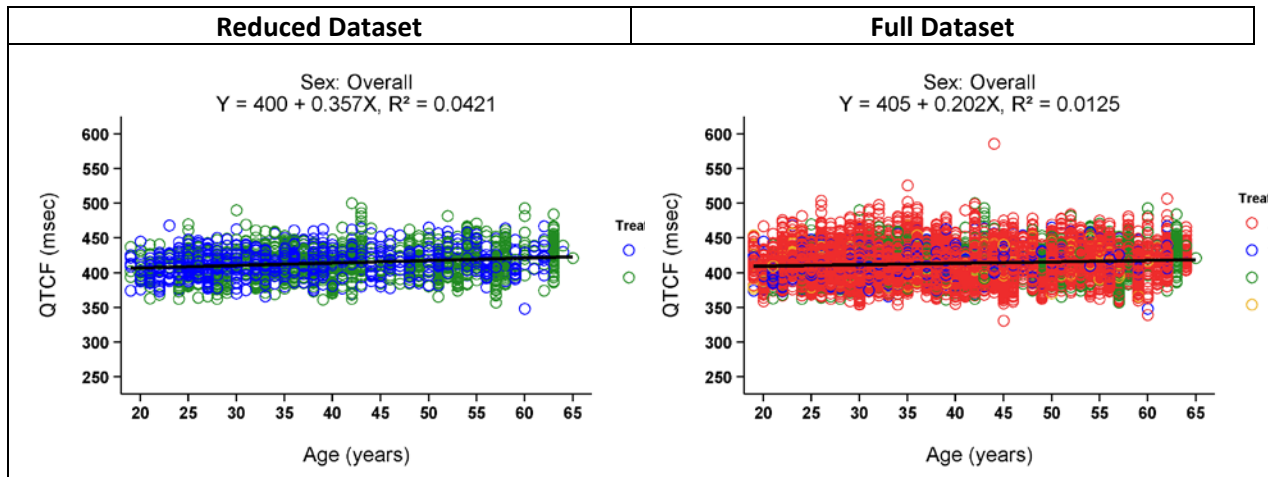

Supplement: CPT-106-576-s001.pdf [file CPT-106-576-s001.pdf]
