# Supplementary material for: Evaluation of the Effects of a Monthly Buprenorphine Depot Subcutaneous Injection on QT Interval During Treatment for Opioid Use Disorder
Source: PubMed Central journal article supplement (PMC6766787; doi:10.1002/cpt.1406), 2019-04-08
Supplement: CPT-106-576-s002.pdf [file CPT-106-576-s002.pdf]

**Table S1: Summary of Concomitant Medications**

| Characteristic          | Statistic | 10-0011    | 11-0020    | 12-0005     | 13-0001     | 13-0006    | Overall      |
|-------------------------|-----------|------------|------------|-------------|-------------|------------|--------------|
| Methocarbamol: No Use   | N (%)     | 1 (8.33%)  | 7 (14.6%)  | 44 (36.1%)  | 855 (98.7%) | 43 (65.2%) | 950 (85.3%)  |
| Methocarbamol: Use      | N (%)     | 11 (91.7%) | 41 (85.4%) | 78 (63.9%)  | 11 (1.27%)  | 23 (34.8%) | 164 (14.7%)  |
| Clonidine: No Use       | N (%)     | 0 (0%)     | 7 (14.6%)  | 52 (42.6%)  | 842 (97.2%) | 66 (100%)  | 967 (86.8%)  |
| Clonidine: Use          | N (%)     | 12 (100%)  | 41 (85.4%) | 70 (57.4%)  | 24 (2.77%)  | 0 (0%)     | 147 (13.2%)  |
| Hydroxyzine: No Use     | N (%)     | 0 (0%)     | 3 (6.25%)  | 35 (28.7%)  | 811 (93.6%) | 32 (48.5%) | 881 (79.1%)  |
| Hydroxyzine: Use        | N (%)     | 12 (100%)  | 45 (93.8%) | 87 (71.3%)  | 55 (6.35%)  | 34 (51.5%) | 233 (20.9%)  |
| Oxycodone: No Use       | N (%)     | 5 (41.7%)  | 14 (29.2%) | 68 (55.7%)  | 706 (81.5%) | 49 (74.2%) | 842 (75.6%)  |
| Oxycodone: Use          | N (%)     | 7 (58.3%)  | 34 (70.8%) | 54 (44.3%)  | 160 (18.5%) | 17 (25.8%) | 272 (24.4%)  |
| Cocaine: No Use         | N (%)     | 10 (83.3%) | 31 (64.6%) | 95 (77.9%)  | 484 (55.9%) | 39 (59.1%) | 659 (59.2%)  |
| Cocaine: Use            | N (%)     | 2 (16.7%)  | 17 (35.4%) | 27 (22.1%)  | 382 (44.1%) | 27 (40.9%) | 455 (40.8%)  |
| Amphetamine: No Use     | N (%)     | 12 (100%)  | 31 (64.6%) | 101 (82.8%) | 671 (77.5%) | 43 (65.2%) | 858 (77.0%)  |
| Amphetamine: Use        | N (%)     | 0 (0%)     | 17 (35.4%) | 21 (17.2%)  | 195 (22.5%) | 23 (34.8%) | 256 (23.0%)  |
| Methadone: No Use       | N (%)     | 4 (33.3%)  | 19 (39.6%) | 117 (95.9%) | 757 (87.4%) | 64 (97.0%) | 961 (86.3%)  |
| Methadone: Use          | N (%)     | 8 (66.7%)  | 29 (60.4%) | 5 (4.10%)   | 109 (12.6%) | 2 (3.03%)  | 153 (13.7%)  |
| Cannabinoid: No Use     | N (%)     | 10 (83.3%) | 14 (29.2%) | 48 (39.3%)  | 511 (59.0%) | 30 (45.5%) | 613 (55.0%)  |
| Cannabinoid: Use        | N (%)     | 2 (16.7%)  | 34 (70.8%) | 74 (60.7%)  | 355 (41.0%) | 36 (54.5%) | 501 (45.0%)  |
| Barbiturate: No Use     | N (%)     | 12 (100%)  | 45 (93.8%) | 122 (100%)  | 842 (97.2%) | 65 (98.5%) | 1086 (97.5%) |
| Barbiturate: Use        | N (%)     | 0 (0%)     | 3 (6.25%)  | 0 (0%)      | 24 (2.77%)  | 1 (1.52%)  | 28 (2.51%)   |
| Methamphetamine: No Use | N (%)     | 4 (33.3%)  | 20 (41.7%) | 110 (90.2%) | 781 (90.2%) | 58 (87.9%) | 973 (87.3%)  |
| Methamphetamine: Use    | N (%)     | 8 (66.7%)  | 28 (58.3%) | 12 (9.84%)  | 85 (9.82%)  | 8 (12.1%)  | 141 (12.7%)  |
| Phencyclidine: No Use   | N (%)     | 12 (100%)  | 46 (95.8%) | 114 (93.4%) | 832 (96.1%) | 66 (100%)  | 1070 (96.1%) |
| Phencyclidine: Use      | N (%)     | 0 (0%)     | 2 (4.17%)  | 8 (6.56%)   | 34 (3.93%)  | 0 (0%)     | 44 (3.95%)   |
| Codeine: No Use         | N (%)     | 12 (100%)  | 47 (97.9%) | 120 (98.4%) | 351 (40.5%) | 66 (100%)  | 596 (53.5%)  |
| Codeine: Use            | N (%)     | 0 (0%)     | 1 (2.08%)  | 2 (1.64%)   | 515 (59.5%) | 0 (0%)     | 518 (46.5%)  |
| Hydrocodone: No Use     | N (%)     | 12 (100%)  | 25 (52.1%) | 104 (85.2%) | 735 (84.9%) | 65 (98.5%) | 941 (84.5%)  |
| Hydrocodone: Use        | N (%)     | 0 (0%)     | 23 (47.9%) | 18 (14.8%)  | 131 (15.1%) | 1 (1.52%)  | 173 (15.5%)  |
| Hydromorphone: No Use   | N (%)     | 0 (0%)     | 42 (87.5%) | 117 (95.9%) | 327 (37.8%) | 66 (100%)  | 552 (49.6%)  |
| Hydromorphone: Use      | N (%)     | 12 (100%)  | 6 (12.5%)  | 5 (4.10%)   | 539 (62.2%) | 0 (0%)     | 562 (50.4%)  |
| Morphine: No Use        | N (%)     | 12 (100%)  | 42 (87.5%) | 116 (95.1%) | 279 (32.2%) | 66 (100%)  | 515 (46.2%)  |
| Morphine: Use           | N (%)     | 0 (0%)     | 6 (12.5%)  | 6 (4.92%)   | 587 (67.8%) | 0 (0%)     | 599 (53.8%)  |
| Oxymorphone: No Use     | N (%)     | 12 (100%)  | 47 (97.9%) | 120 (98.4%) | 721 (83.3%) | 66 (100%)  | 966 (86.7%)  |
| Oxymorphone: Use        | N (%)     | 0 (0%)     | 1 (2.08%)  | 2 (1.64%)   | 145 (16.7%) | 0 (0%)     | 148 (13.3%)  |
| Heroin: No Use          | N (%)     | 12 (100%)  | 26 (54.2%) | 33 (27.0%)  | 866 (100%)  | 66 (100%)  | 1003 (90.0%) |
| Heroin: Use             | N (%)     | 0 (0%)     | 22 (45.8%) | 89 (73.0%)  | 0 (0%)      | 0 (0%)     | 111 (9.96%)  |

Use = subject received the concomitant medication at any point during the study, No Use = subject did not receive the concomitant medication at any point during the study

**Table S2: Results from Sensitivity Analysis Evaluating the Effect of Adding IIV onto Alpha, Using the Phase 3 Data Alone, and Eliminating the Effect of Age on QTcAbs**

|                                                  | Final Model |       | Adding IIV on Alpha |       | Phase 3 data Only |       | Eliminating Age |       |
|--------------------------------------------------|-------------|-------|---------------------|-------|-------------------|-------|-----------------|-------|
|                                                  | Estimate    | %RSE  | Estimate            | %RSE  | Estimate          | %RSE  | Estimate        | %RSE  |
| QTcAbs (msec)                                    | 400         | 0.2   | 400                 | 0.229 | 400               | 0.1   | 411             | 0.2   |
| Alpha                                            | 0.333       |       | 0.333               |       | 0.333             |       | 0.333           |       |
| Sex on QTcAbs                                    | 0.0189      | 13.7  | 0.0196              | 13.7  | 0.018             | 17.1  | 0.0164          | 16.3  |
| COWS on alpha                                    | 0.00151     | 52.1  | 0.00157             | 43.2  | 0.00312           | 24.8  | 0.0016          | 49.5  |
| Hydroxyzine on QTcAbs                            | 0.00423     | 35.7  | 0.00473             | 31.3  | 0.0079            | 34.1  | 0.00398         | 37.4  |
| Methadone on QTcAbs                              | 0.0153      | 18.4  | 0.0156              | 18.2  | 0.00293           | 76.1  | 0.0148          | 18.4  |
| Age on QTcAbs                                    | 0.324       | 7     | 0.326               | 7.2   | 0.334             | 4.1   |                 |       |
| Holter vs non-Holter on QTcAbs                   | -0.00423    | 24.6  | -0.00314            | 31.5  | -0.00426          | 24.4  | -0.00409        | 24.7  |
| Central vs non-central reading on QTcAbs         | -0.021      | 11.5  | -0.0195             | 13.5  | -0.021            |       | -0.0166         | 16.3  |
| Concentration-related slope (msec/ng/mL)         | -0.0507     | 168.8 | -0.0604             | 131   | -0.0157           | 595.5 | -0.0431         | 200.9 |
| Codeine on QTcAbs                                | 0.00327     | 35.2  | 0.00318             | 34.3  | 0.00382           | 30.1  | 0.00326         | 34.4  |
| Oxycodone on QTcAbs                              | -0.00378    | 43.4  | -0.00332            | 47.0  | -0.00205          | 104.9 | -0.00392        | 40.8  |
| Phencyclidine on QTcAbs                          | 0.00861     | 44.1  | 0.00958             | 40.6  | 0.0109            | 40.9  | 0.00844         | 43.6  |
| Barbiturates on QTcAbs                           | 0.0124      | 38.9  | 0.0116              | 42.2  | 0.0135            | 35    | 0.0119          | 39.3  |
| Cocaine on QTcAbs                                | 0.00428     | 28    | 0.00429             | 28.4  | 0.00322           | 40.1  | 0.00438         | 26.7  |
| IIV on QTcAbs (±msec)                            | 14.3        | 5.2   | 14.4                | 5.3   | 14.8              | 6.1   | 14.7            | 5.2   |
| IIV on concentration-related slope (±msec/ng/mL) | 0.767       | 33.1  | 0.581               | 38.9  | 0.7714            | 30.1  | 0.7609          | 35.8  |
| IIV on alpha                                     | NA          |       | 0.0535              | 14.7  | NA                |       | NA              |       |
| Residual error (±msec)                           | 10.6        | 3.3   | 10.2                | 3.17  | 10.3              | 2.6   | 10.6            | 3.3   |
